# Supplementary material for: Challenges and benefits of quantifying irrigation through the assimilation of Sentinel-1 backscatter observations into Noah-MP
Source: Copernicus journal article supplement (doi:10.5194/hess-2022-61), 2022-03-02
Supplement: Supplementary file 1 [file hess-2022-61-supplement.pdf]

## Supplementary Material

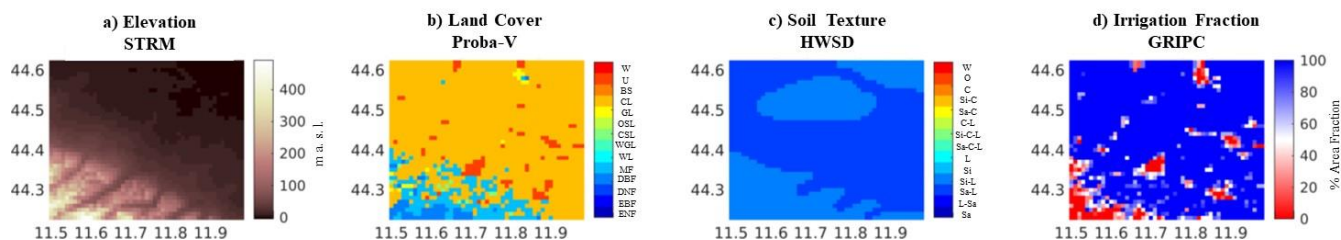

Figure S1: LIS input data over the Italian pilot site: a) elevation from the Shuttle Radar Topography Mission (SRTM); b) Proba-V LC; c) soil texture from the HWSD; and d) irrigation fraction map obtained from the GRIPC map.

5

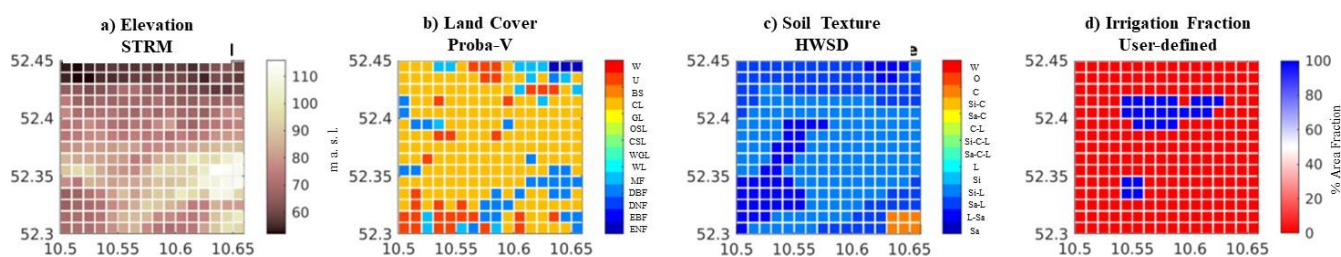

Figure S2: Same as S1, but for the Germany pilot site. In this case d) irrigation fraction map is user-defined.

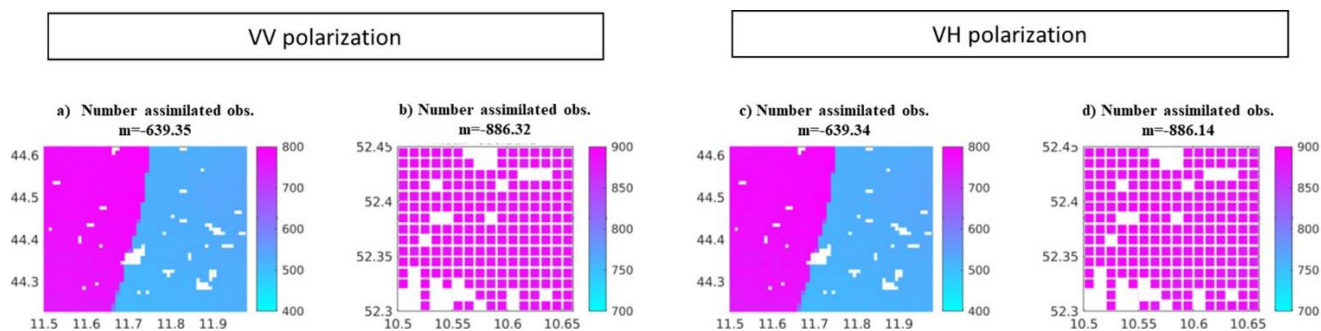

10 Figure S3: Maps of the number of assimilated Sentinel-1 observations for: Sentinel-1  $\gamma^0$  VV DA a) in Italy and b) in Germany; Sentinel-1  $\gamma^0$  VH DA c) in Italy and d) in Germany.  $m$  is the mean over the entire study area. The reference period is January 2015-December 2020.

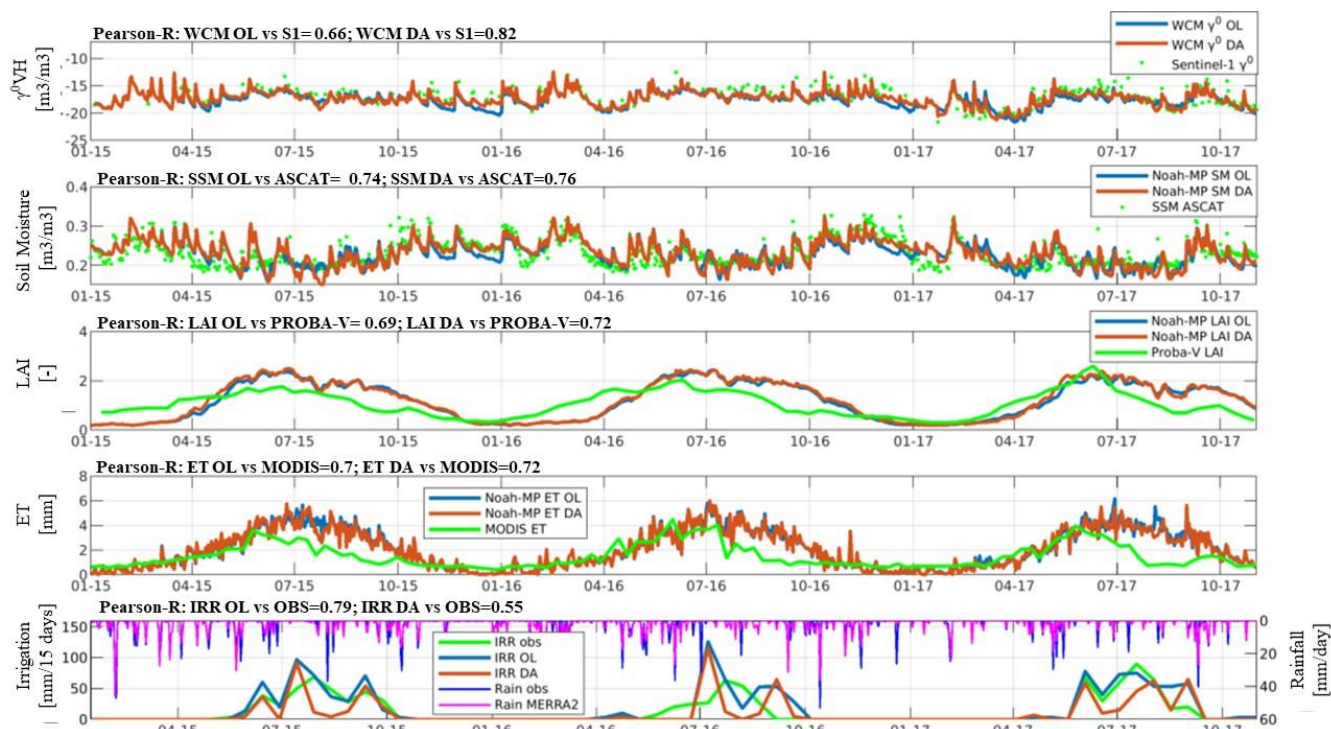

15 **Figure S4: Evaluation of the OL (blue lines) and DA (orange lines) runs at the Budrio test site for the Sentinel-1  $\gamma^0$  VH DA experiment: a) Sentinel-1  $\gamma^0$  VH against WCM  $\gamma^0$  VH; b) ASCAT SSM against simulated SSM; c) Proba-V LAI against simulated LAI; d) MODIS ET against simulated ET; e) irrigation benchmark against simulated irrigation.**

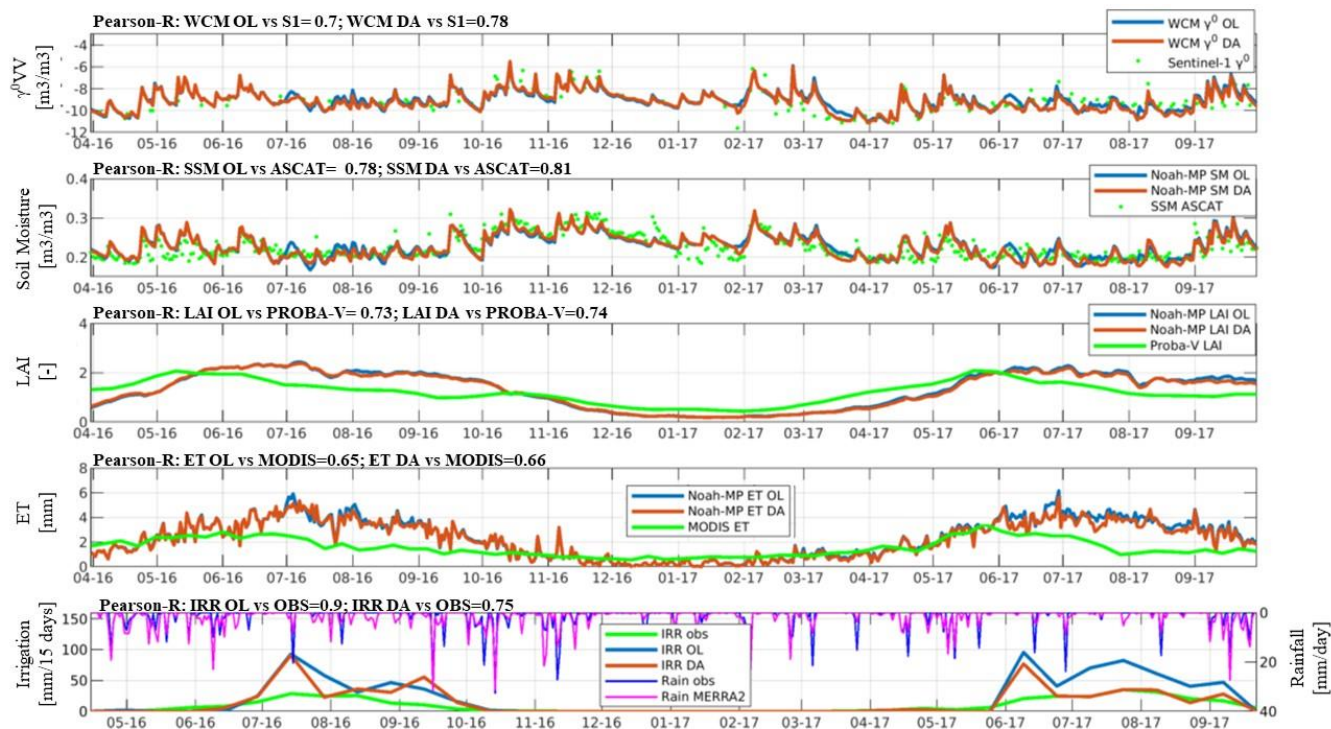

Figure S5: Same as Figure S4, but at the Faenza F1 test site for the Sentinel-1  $\gamma^0$  VV DA experiment.

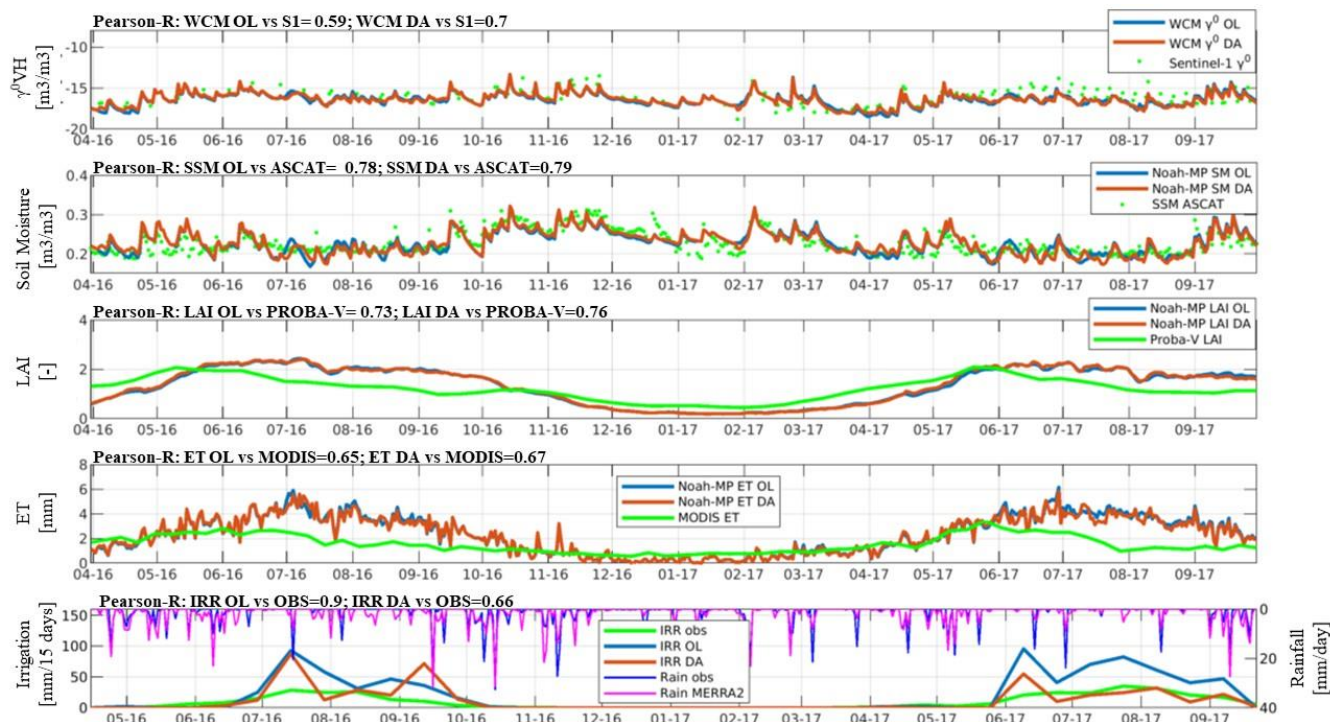

Figure S6: Same as Figure S4, but at the Faenza F1 test site for the Sentinel-1  $\gamma^0$  VH DA experiment
